# Supplementary material for: Passive and Motivated Perception of Emotional Faces: Qualitative and Quantitative Changes in the Face Processing Network
Source: PubMed Central journal article supplement (PMC3386961; doi:10.1371/journal.pone.0040371), 2012-06-29
Supplement: pone.0040371.s001.pdf [file pone.0040371.s001.pdf]

Table S1: Full results of connectivity (PPI) analysis by seed and by run.

| A. LEFT FUSIFORM SEED                        |        |     |     |     |                                                   |        |     |     |     |
|----------------------------------------------|--------|-----|-----|-----|---------------------------------------------------|--------|-----|-----|-----|
| RUN 1 - BASELINE                             |        |     |     |     | RUN 2 - MOTIVATED                                 |        |     |     |     |
| Area                                         | Peak T | x   | y   | z   | Area                                              | Peak T | x   | y   | z   |
| R <b>fusiform gyrus</b>                      | 4.71   | 38  | -56 | -14 | R <b>inferior occipital gyrus</b>                 | 6.12   | 30  | -96 | -4  |
| R <b>anterior insula</b>                     | 5.36   | 36  | 14  | 8   | R <b>fusiform gyrus</b>                           | 4.34   | 26  | -58 | -16 |
|                                              |        |     |     |     | R <b>amygdala</b>                                 | 6.37   | 26  | 4   | -18 |
| R <b>subgenual anterior cingulate cortex</b> | 3.67   | 2   | 26  | -4  | L <b>amygdala</b>                                 | 5.11   | -22 | 0   | -14 |
| R <b>supramarginal gyrus</b>                 | 4.3    | 68  | -32 | 24  | L <b>inferior frontal gyrus (triangular part)</b> | 5.35   | -38 | 30  | 6   |
| R <b>angular gyrus</b>                       | 4.26   | 44  | -62 | 48  | L <b>inferior frontal gyrus (triangular part)</b> | 5.18   | -44 | 42  | 10  |
| R superior frontal gyrus                     | 5.97   | 28  | 50  | 8   | R <b>lateral orbitofrontal cortex</b>             | 4.61   | 48  | 30  | -18 |
| L middle frontal gyrus                       | 5.1    | -32 | 34  | 16  |                                                   |        |     |     |     |
| R middle frontal gyrus                       | 4.91   | 44  | 52  | 8   | R <b>temporal pole</b>                            | 4.92   | 56  | 10  | -18 |
| R paracentral lobule                         | 3.4    | 6   | -18 | 48  | R <b>pre-supplementary motor area</b>             | 4.39   | 8   | 10  | 68  |
| R superior temporal gyrus                    | 4.59   | 66  | -30 | 2   | L <b>pre-supplementary motor area</b>             | 4.56   | -6  | 12  | 70  |
| L superior temporal gyrus                    | 4.21   | -48 | -18 | -4  | R <b>nucleus accumbens</b>                        | 3.98   | 4   | 6   | -10 |
| R middle temporal gyrus                      | 4.2    | 68  | -38 | -4  | L <b>nucleus accumbens</b>                        | 4.64   | -6  | 4   | -10 |
| L middle temporal gyrus                      | 3.83   | -62 | -38 | -2  | R <b>basal forebrain</b>                          | 5.59   | 8   | 6   | -18 |
| R precuneus                                  | 4.9    | 8   | -54 | 56  | R <b>hippocampus</b>                              | 7.42   | 22  | -20 | -12 |
| R superior parietal lobule                   | 3.73   | 18  | -62 | 58  | R superior medial prefrontal cortex               | 4.95   | 2   | 52  | 20  |
| R thalamus                                   | 4.32   | 22  | -20 | 8   | R <b>dorsal anterior cingulate cortex</b>         | 5.11   | 2   | 30  | 22  |
| L caudate                                    | 3.98   | -16 | 14  | 14  | R <b>anterior middle cingulate cortex</b>         | 5.3    | 4   | -6  | 42  |
|                                              |        |     |     |     | R superior frontal gyrus                          | 4.76   | 24  | 46  | 18  |
|                                              |        |     |     |     | L superior frontal gyrus                          | 4.42   | -18 | 48  | 18  |
|                                              |        |     |     |     | L superior temporal gyrus                         | 4.33   | -60 | -24 | 12  |
|                                              |        |     |     |     | L cuneus                                          | 4.62   | 0   | -84 | 20  |
|                                              |        |     |     |     | R lingual gyrus                                   | 7.59   | 12  | -54 | -6  |
|                                              |        |     |     |     | L lingual gyrus                                   | 5.02   | -10 | -54 | -2  |
|                                              |        |     |     |     | R middle occipital gyrus                          | 5.01   | 36  | -76 | 22  |
|                                              |        |     |     |     | L middle occipital gyrus                          | 5.24   | -28 | -74 | 20  |

| B. RIGHT FUSIFORM SEED                      |        |     |     |    |  |                                     |        |     |     |     |  |
|---------------------------------------------|--------|-----|-----|----|--|-------------------------------------|--------|-----|-----|-----|--|
| RUN 1 - BASELINE                            |        |     |     |    |  | RUN 2 - MOTIVATED                   |        |     |     |     |  |
| Area                                        | Peak T | x   | y   | z  |  | Area                                | Peak T | x   | y   | z   |  |
| R inferior frontral gyrus (triangular part) | 5.24   | 50  | 34  | 16 |  | L fusiform gyrus                    | 5.2    | -36 | -58 | -18 |  |
| R anterior insula                           | 4.95   | 34  | 14  | 10 |  | L amygdala                          | 4.89   | -22 | -6  | -10 |  |
| R lateral orbitofrontal cortex              | 5.13   | 36  | 62  | -2 |  | R temporal pole                     | 3.35   | 28  | 18  | -28 |  |
| R posterior superior temporal gyrus         | 5.23   | 64  | -32 | 4  |  | L temporal pole                     | 3.36   | -44 | 24  | -16 |  |
| R supramarginal gyrus                       | 4.83   | 68  | -32 | 28 |  | R pre-supplementary motor area      | 4.78   | 6   | 10  | 72  |  |
| R angular gyrus                             | 5.03   | 48  | -60 | 44 |  | L pre-supplementary motor area      | 4.36   | -4  | 10  | 70  |  |
| R superior frontal gyrus                    | 6.34   | 26  | 50  | 8  |  | R basal forebrain                   | 5.18   | 14  | -6  | -12 |  |
| R middle frontal gyrus                      | 4.83   | 42  | 50  | 6  |  | R hippocampus                       | 3.87   | 40  | -22 | -16 |  |
| L middle frontal gyrus                      | 5.7    | -26 | 56  | 12 |  | L hippocampus                       | 3.88   | -36 | -18 | -18 |  |
| L paracentral lobule                        | 5.66   | 0   | -26 | 50 |  | L anterior middle cingulate cortex  | 3.52   | 0   | -8  | 42  |  |
| L middle temporal gyrus                     | 4.91   | -64 | -24 | 2  |  | L superior medial prefrontal cortex | 3.89   | -8  | 54  | 18  |  |
| R middle temporal gyrus                     | 4.89   | 54  | -68 | 18 |  | R superior frontal gyrus            | 3.75   | 26  | 48  | 14  |  |
| L inferior parietal lobule                  | 5.38   | -40 | -52 | 36 |  |                                     |        |     |     |     |  |
| R precuneus                                 | 5.28   | 10  | -52 | 54 |  |                                     |        |     |     |     |  |
| L middle occipital gyrus                    | 5.85   | -48 | -70 | 4  |  |                                     |        |     |     |     |  |
| R calcarine                                 | 5.36   | 22  | -90 | 0  |  |                                     |        |     |     |     |  |
| R medial dorsal thalamus                    | 4.82   | 6   | -12 | 6  |  |                                     |        |     |     |     |  |
| L putamen                                   | 5.03   | -20 | 8   | 6  |  |                                     |        |     |     |     |  |
| L caudate nucleus                           | 4.51   | -10 | 18  | 6  |  |                                     |        |     |     |     |  |

| C. LEFT AMYGDALA SEED         |        |     |     |     |                                      |        |     |     |     |
|-------------------------------|--------|-----|-----|-----|--------------------------------------|--------|-----|-----|-----|
| RUN 1 - BASELINE              |        |     |     |     | RUN 2 - MOTIVATED                    |        |     |     |     |
| Area                          | Peak T | x   | y   | z   | Area                                 | Peak T | x   | y   | z   |
| R amygdala                    | 3.81   | 28  | 2   | -24 | R inferior occipital gyrus           | 3.71   | 26  | -98 | -6  |
| L medial orbitofrontal cortex | 3.29   | -6  | 50  | -8  | R fusiform gyrus                     | 4.56   | 36  | -54 | -12 |
| R cuneus                      | 4.55   | 12  | -88 | 20  | L fusiform gyrus                     | 4.59   | -36 | -64 | -16 |
| R lingual gyrus               | 3.86   | 24  | -66 | -4  | R posterior superior temporal sulcus | 3.97   | 50  | -76 | 16  |
| L calcarine                   | 3.47   | -10 | -78 | 10  | L posterior superior temporal sulcus | 4.86   | -52 | -70 | 24  |
|                               |        |     |     |     | R lateral orbitofrontal cortex       | 4.73   | 34  | 26  | -24 |
|                               |        |     |     |     | L lateral orbitofrontal cortex       | 4.58   | -22 | 12  | -24 |
|                               |        |     |     |     | L temporal pole                      | 5.94   | -34 | 22  | -24 |
|                               |        |     |     |     | R pre-supplementary motor area       | 4.56   | -4  | 14  | 44  |
|                               |        |     |     |     | L anterior hippocampus               | 3.88   | -30 | -10 | -14 |
|                               |        |     |     |     | L posterior hippocampus              | 4.43   | -36 | -42 | -4  |
|                               |        |     |     |     | R parahippocampal cortex             | 4.5    | 36  | -34 | -14 |
|                               |        |     |     |     | L superior medial prefrontal cortex  | 4.62   | -2  | -52 | 40  |
|                               |        |     |     |     | L posterior cingulate gyrus          | 4.41   | -2  | -46 | 32  |
|                               |        |     |     |     | L middle frontal gyrus               | 4.69   | -26 | 42  | 34  |
|                               |        |     |     |     | L precentral gyrus                   | 6.61   | -32 | 0   | 44  |
|                               |        |     |     |     | R middle temporal gyrus              | 4.52   | 44  | -74 | 26  |
|                               |        |     |     |     | L middle temporal gyrus              | 6.61   | -30 | -22 | -16 |
|                               |        |     |     |     | R posterior inferior temporal gyrus  | 3.91   | 52  | -64 | -8  |
|                               |        |     |     |     | L inferior temporal gyrus            | 4.63   | -60 | -24 | -16 |
|                               |        |     |     |     | L lingual gyrus                      | 4.01   | -14 | -38 | -6  |
|                               |        |     |     |     | L hypothalamus                       | 4.04   | -8  | -2  | -6  |
|                               |        |     |     |     | L substantia nigra                   | 4.02   | -14 | -22 | -8  |
|                               |        |     |     |     | R caudate body                       | 3.77   | 18  | -14 | 20  |
|                               |        |     |     |     | L caudate body                       | 4.29   | -12 | 0   | 20  |
|                               |        |     |     |     | R superior colliculus                | 4.26   | 4   | -22 | -4  |
|                               |        |     |     |     | L superior colliculus                | 3.66   | -4  | -24 | -4  |

| D. RIGHT AMYGDALA SEED                            |        |     |     |     |                                                   |        |     |     |     |
|---------------------------------------------------|--------|-----|-----|-----|---------------------------------------------------|--------|-----|-----|-----|
| RUN 1 - BASELINE                                  |        |     |     |     | RUN 2 - MOTIVATED                                 |        |     |     |     |
| Area                                              | Peak T | x   | y   | z   | Area                                              | Peak T | x   | y   | z   |
| R <b>inferior frontal gyrus (triangular part)</b> | 3.72   | 54  | 24  | 26  | R <b>inferior frontal gyrus (triangular part)</b> | 4.91   | 48  | 36  | -4  |
| R <b>lateral orbitofrontal cortex</b>             | 3.51   | 34  | 34  | -22 | R <b>posterior superior temporal sulcus</b>       | 3.29   | 50  | -46 | 16  |
| L <b>temporal pole</b>                            | 3.78   | -44 | 16  | -28 | R <b>nucleus accumbens</b>                        | 3.83   | 8   | 10  | -6  |
| R <b>parahippocampal cortex</b>                   | 4.9    | 24  | 6   | -26 | L <b>nucleus accumbens</b>                        | 5.36   | -10 | 6   | -8  |
| L <b>hippocampus</b>                              | 3.69   | -26 | -6  | -22 | R <b>basal forebrain</b>                          | 4.04   | 12  | 6   | -14 |
| R middle frontal gyrus                            | 3.88   | 48  | 42  | 10  | R <b>medial orbitofrontal cortex</b>              | 3.7    | 2   | 54  | -6  |
| R supramarginal gyrus                             | 3.47   | 42  | -32 | 40  | R <b>parahippocampal cortex</b>                   | 5.3    | 30  | -2  | -34 |
| R middle temporal gyrus (MT)                      | 4.7    | 52  | -66 | -2  | R <b>hippocampus</b>                              | 3.66   | 30  | -8  | -26 |
| L middle temporal gyrus (MT)                      | 3.84   | -66 | -40 | -2  | L <b>hippocampus</b>                              | 3.14   | -22 | -26 | -14 |
| R middle occipital gyrus                          | 4.2    | 42  | -82 | 10  | R <b>dorsal anterior cingulate cortex</b>         | 3.51   | 2   | 38  | 12  |
| L middle occipital gyrus                          | 4.07   | -44 | -88 | 10  | R superior medial prefrontal cortex               | 3.25   | 8   | 52  | 18  |
| L thalamus                                        | 4.39   | -12 | -22 | -2  | R superior temporal gyrus                         | 3.63   | 52  | -26 | -4  |
|                                                   |        |     |     |     | R middle temporal gyrus (MT)                      | 4.32   | 54  | -72 | 6   |
|                                                   |        |     |     |     | L middle temporal gyrus                           | 3.61   | -52 | -22 | -12 |
|                                                   |        |     |     |     | L lingual gyrus                                   | 3.18   | -12 | -54 | 0   |
|                                                   |        |     |     |     | R thalamus                                        | 4.24   | 8   | -6  | -2  |
|                                                   |        |     |     |     | L thalamus                                        | 4.53   | -8  | -24 | 0   |

| E. LOCUS COERULEUS SEED                      |        |     |     |     |                                              |        |     |     |     |
|----------------------------------------------|--------|-----|-----|-----|----------------------------------------------|--------|-----|-----|-----|
| RUN 1 - BASELINE                             |        |     |     |     | RUN 2 - MOTIVATED                            |        |     |     |     |
| Area                                         | Peak T | x   | y   | z   | Area                                         | Peak T | x   | y   | z   |
| R <b>parahippocampal cortex</b>              | 3.12   | 26  | -24 | -22 | R <b>fusiform gyrus</b>                      | 3.67   | 36  | -64 | -20 |
| L <b>subgenual anterior cingulate cortex</b> | 3.27   | -2  | 18  | -6  | L <b>fusiform gyrus</b>                      | 3.52   | -36 | -34 | -24 |
| R precentral gyrus                           | 3.27   | 44  | 0   | 34  | R <b>inferior frontal gyrus (triangular)</b> | 3.82   | 44  | 12  | 24  |
| L superior temporal gyrus                    | 3.74   | -52 | -26 | 0   | L <b>anterior insula</b>                     | 3.24   | -28 | 14  | -14 |
| R middle temporal gyrus                      | 3.51   | 66  | -12 | -4  | R <b>amygdala</b>                            | 2.71   | 22  | 4   | -16 |
| R lingual gyrus                              | 3.18   | 10  | -46 | 4   | R <b>temporal pole</b>                       | 3.67   | 34  | 26  | -26 |
| L middle occipital gyrus                     | 3.61   | -26 | -82 | 14  | R <b>basal forebrain</b>                     | 3.73   | 10  | 0   | -14 |
| L middle occipital gyrus                     | 3.11   | -42 | -78 | 14  | R <b>parahippocampal cortex</b>              | 4.18   | 36  | -18 | -26 |
| midbrain                                     | 3.77   | 2   | -36 | -14 | L <b>hippocampus</b>                         | 3.54   | -26 | -10 | -22 |
|                                              |        |     |     |     | <b>dorsal anterior cingulate cortex</b>      | 3.47   | 0   | 32  | 14  |
|                                              |        |     |     |     | <b>anterior midcingulate cortex</b>          | 3.78   | 0   | 6   | 32  |
|                                              |        |     |     |     | R superior medial prefrontal cortex          | 3.51   | 8   | 52  | 24  |
|                                              |        |     |     |     | L medial prefrontal cortex                   | 3.04   | -4  | 58  | 0   |
|                                              |        |     |     |     | L posterior cingulate cortex                 | 3.21   | -2  | -44 | 32  |
|                                              |        |     |     |     | R precuneus                                  | 3.64   | 10  | -78 | 56  |
|                                              |        |     |     |     | L superior parietal lobule                   | 3.73   | -32 | -62 | 62  |
|                                              |        |     |     |     | L calcarine                                  | 5.02   | -4  | -84 | -12 |
|                                              |        |     |     |     | L lingual gyrus                              | 4.42   | -30 | -84 | -14 |
|                                              |        |     |     |     | midbrain                                     | 4.86   | 0   | -36 | -16 |
